# Supplementary material
Source: PubMed Central journal article supplement (PMC4428043)

# Supp Figure 1

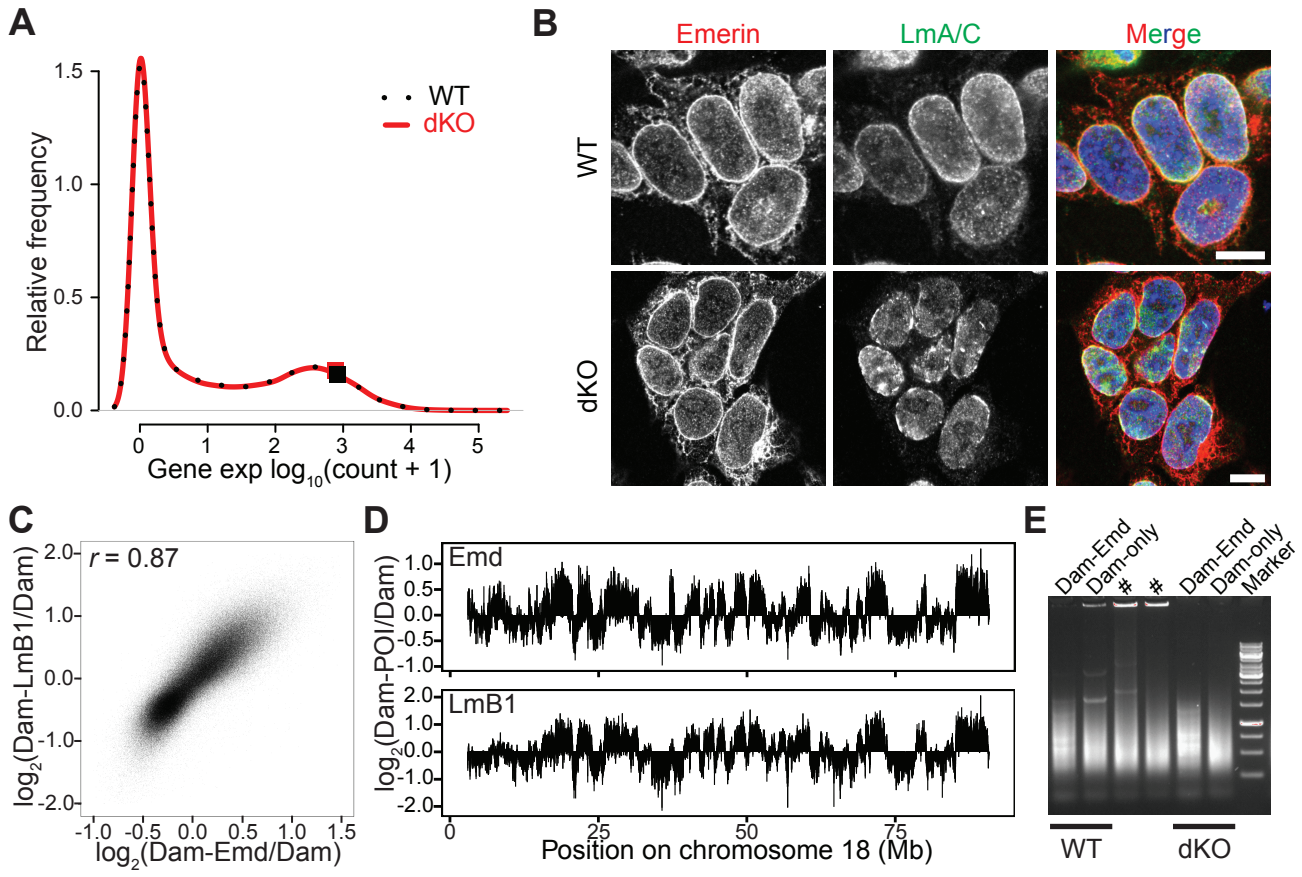

## Supp. Figure 2

**A**

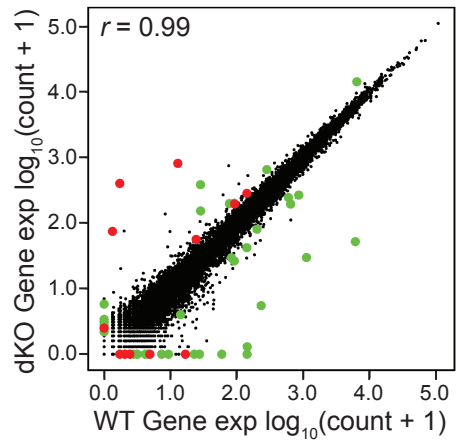

**B**

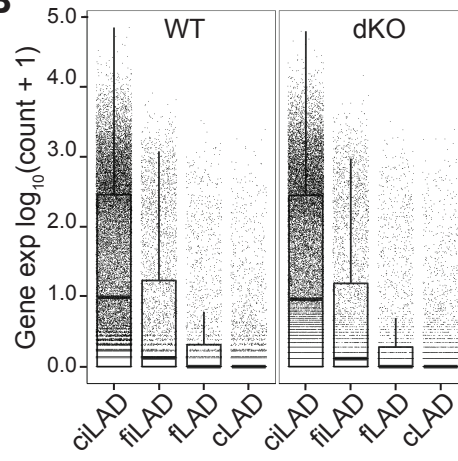

**C**

Concordance

All genes: 97.9%

Constitutive: 98.0%

Facultative: 97.5%



# Supp Figure 3

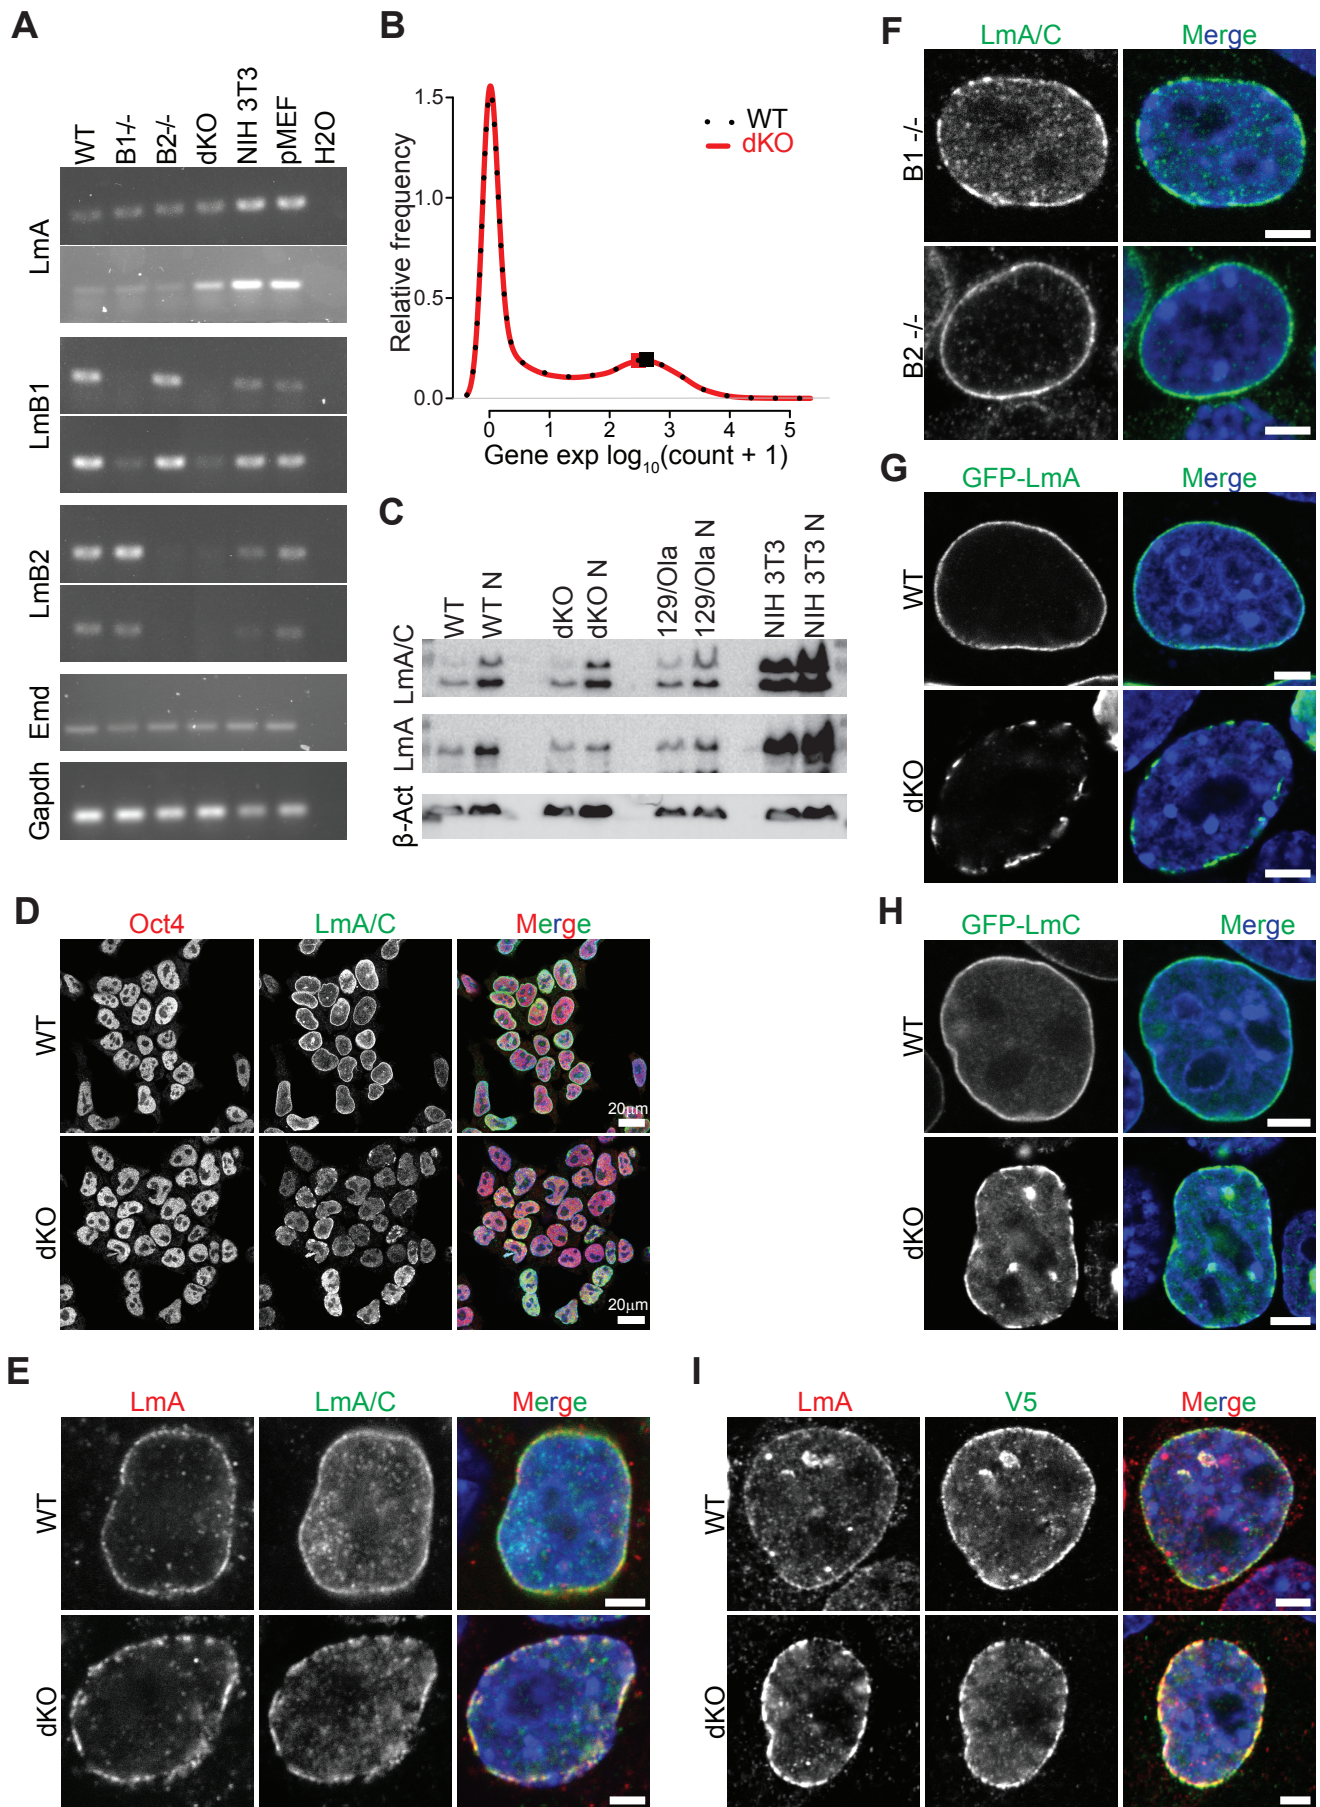

# Supp Figure 4

**A**

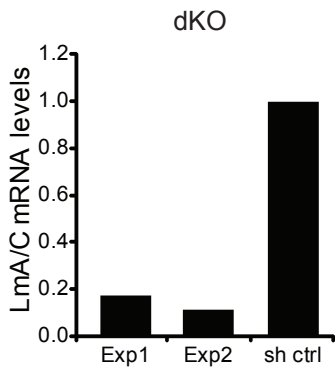

**B**

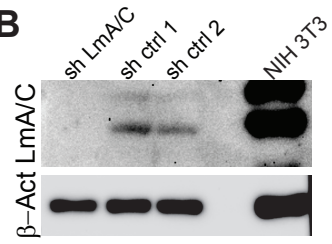

**F**

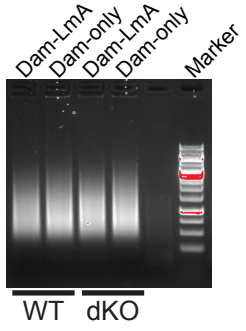

**C**

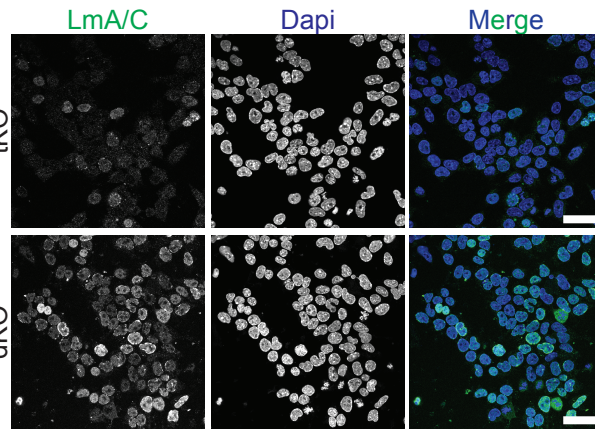

**D**

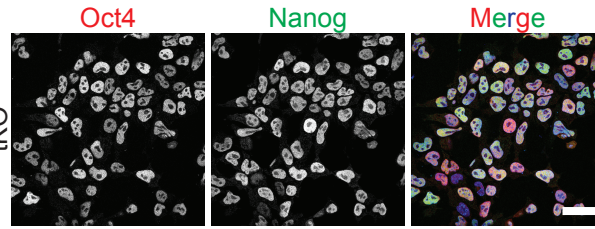

**E**

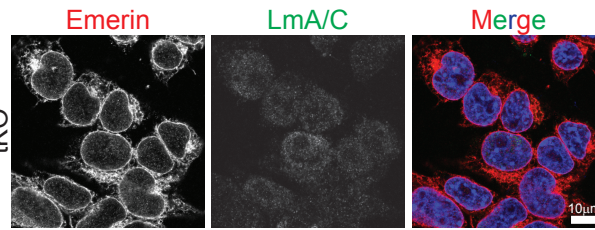

# Supp Figure 5

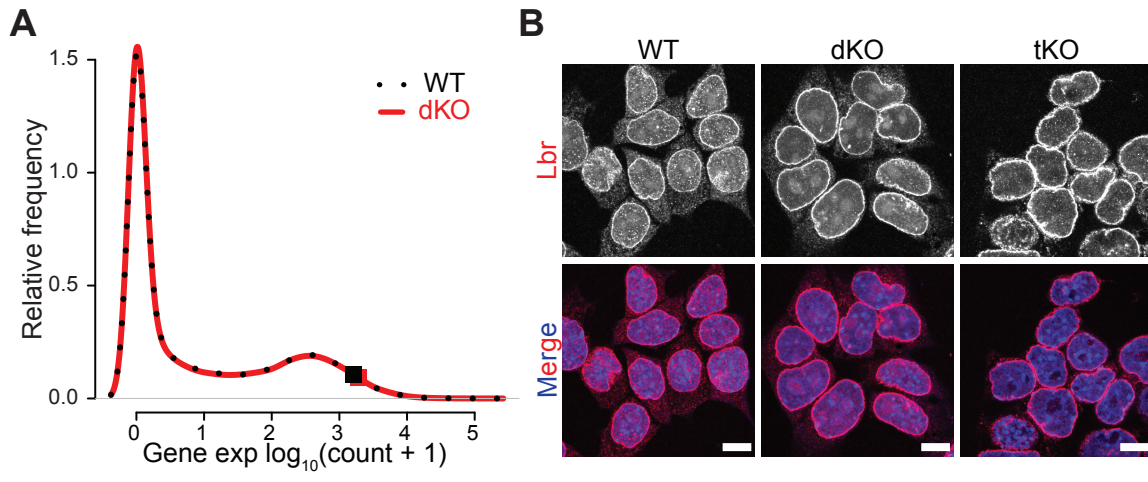



# Supp Figure 6

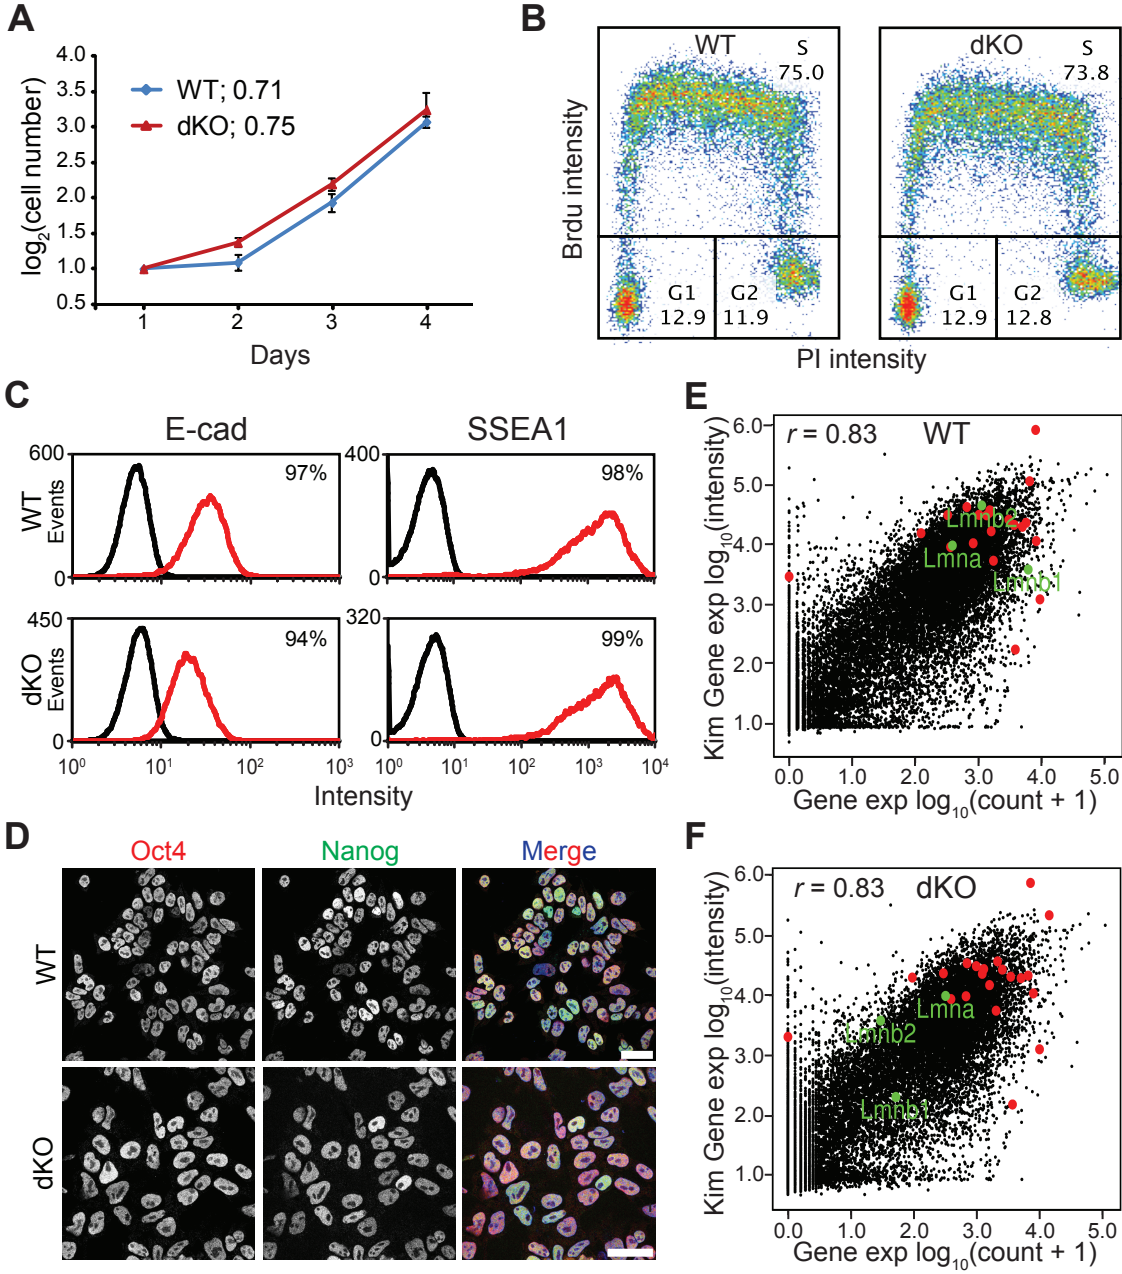

Supplement: embr0016-0610-sd2.pdf [file embr0016-0610-sd2.pdf]
